# Supplementary material for: Clinical effects and safety of proximal femur bionic nail versus proximal femoral nail anti-rotation or InterTAN for the treatment of intertrochanteric femoral fracture: a systematic review and meta-analysis
Source: PeerJ. 2026 Feb 16;14:e20801. doi: 10.7717/peerj.20801 (PMC12919315; doi:10.7717/peerj.20801)
Supplement: Supplemental Information 8 [file peerj-14-20801-s008.xlsx]

## Sheet: Basic characteristics
No.	Study	Country	Participants	Outcome measures	Treatment			Sample size (female/male)			Age (years)			Affected side( R/L)			Follow-up duration
					Intervention	Control		Intervention	Control		Intervention	Control		Intervention	Control
1 cohort	Fu HP 2023	China	Intertrochanteric femoral fracture	Operation duration、Partial weight bearing time、Fracture healing time、FRS、Harris	PFBN	PFNA	Intertan	18(10/8)	36(24/12)	14(9/5)	76.0±4.8	79.7±7.8	81.4±7.6	8/10	24/12	9/5	9-15 months， average 12.4 months
2 cohort	Jin LK 2024	China	Intertrochanteric femoral fracture	Operation duration、 Intraoperative blood loss、 Incision length、Hospital stay、weight bearing time、Fracture healing time、Harris，Postoperative complication rate	PFBN	PFNA	Intertan	25(16/9)	55(38/17)	40(26/14)	73.67±5.16	74.23±5.57	73.45±5.34				1、6、12 months
3 cohort	Liu PY 2023	China	Intertrochanteric femoral fracture	Incision length、 Intraoperative blood loss、Operation duration、Intraoperative fluoroscopy times、Full weight bearing time、Hospital stay、Partial weight bearing time、Fracture healing time，Fracture reduction quality、Harris,Postoperative complication rate	PFBN	PFNA		35（15/20）	37（15/22）		71.81±7.63	72.33±6.47					1、3、6 months
4 cohort	Long ZM 2022	China	Intertrochanteric femoral fracture	Operation duration、Intraoperative blood loss、Hospital stay、weight bearing time、Fracture healing time，Fracture reduction quality、Harris、Postoperative complication rate	PFBN	PFNA		20(9/11)	60(21/39)		63.57±6.84	63.29±5.84					1、3、6 months
5 cohort	Ling F 2023	China	Intertrochanteric femoral fracture	Operation duration、Intraoperative blood loss、Fracture healing time，Fracture reduction quality、Harris、Postoperative complication rate	PFBN	PFNA		28(16/12)	28(18/10)		70.4±7.8	73.0±8.9					（7.3±0.9）、（7.4±1.1）months
6 cohort	Li ZT 2022	China	Intertrochanteric femoral fracture	Operation duration、Intraoperative blood loss、Hospital stay、Fracture reduction quality、weight bearing time、Postoperative complication rate、Harris	PFBN	PFNA		46(24/22)	46(26/20)		75.7±5.2	75.3±4.2					6-12 months average 8.9 months
7 cohort	Lin D 2022	China	Intertrochanteric femoral fracture	Operation duration、Intraoperative blood loss、racture healing time、Full weight bearing time；Harris ；Postoperative complication	PFBN	PFNA		20（14/6）	25（18/7）		78. 7±5. 9	78. 7±8. 2		10/14	8/16		6-21 months average（14.7±3.6）months
8 cohort	Zhang RB 2022	China	Intertrochanteric femoral fracture	Operation duration、Intraoperative blood loss、Hospital stay、weight bearing time	PFBN	PFNA		32（13/19）	32（12/20）		79.24±1.23	79.17±1.21					not mention
9 cohort	Yang DS 2023	China	Intertrochanteric femoral fracture	Operation duration、Intraoperative blood loss、Blood transfusion、Hospital stay、weight bearing time、VAS、Fracture reduction quality、racture healing time、Postoperative complication	PFBN	PFNA		24（13/11）	24（15/9）		79.0±5.0	78.6±5.8					6-15 months PFBN: average 9.8 months PFNA: average 9.6 months
10 cohort	Wang YC 2023	China	Intertrochanteric femoral fracture	Operation duration、Intraoperative blood loss、Incision length、Intraoperative fluoroscopy times、Hospital stay、Full weight bearing time、VAS、Harris 、range of motion（ROM）、Fracture reduction quality、weight bearing time、Femoral neck-shaft angle	PFBN	PFNA		20（11/9）	20(12/8)		75.3±6.4	74.6±6.0		9/11	12/8		1、3、6 months
11 cohort	Wu YX 2023	China	Intertrochanteric femoral fracture	Postoperative complication、Operation duration、Intraoperative blood loss、Fracture reduction quality、racture healing time、Harris	PFBN	PFNA		30(13/17)	30(12/18)		69.4±3.5	69.6±3.2					2 months
12 cohort	Wan Y 2024	China	Intertrochanteric femoral fracture	Operation duration、Intraoperative blood loss、Incision length、Intraoperative fluoroscopy times、Hospital stay、Partial weight bearing time、Hospital stay、Full weight bearing time、VAS、Harris、range of motion（ROM）、Tip-apex distance	PFBN		Intertan	16（11/5）		19（15/4）	78.0±8.8		75.3±7.0	7/9		10/9	average（14.7±2.6）months
13 cohort	Jia C 2023	China	Intertrochanteric femoral fracture	Operation duration、Intraoperative blood loss、Intraoperative fluoroscopy times、Hospital stay、Fracture reduction quality、Postoperative complication、Fracture healing time、Harris	PFBN		Intertan	25(17/8)		20（13/7）	83.28±7.85		79.90 ± 9.60	10/15		6/14	6-18 months average (10.53 ± 2.17) months
14 cohort	Fu Hongpei 2024	China	Intertrochanteric femoral fracture	operation time, intraoperative bleeding, postoperative weight-bearing time, FRS score (6 months postoperative), fracture healing time, and hospitalization time, time from injury to surgery, number of intraoperative fluoroscopies, intraoperative fluid infusion volume, fracture healing time, and postoperative FRS score,	PFBN	PFNA	Intertan	22(12/20)	40(27/13)	20(13/7)	76.27± 4.47	79.15± 7.82	80.55± 7.05	10/12	21/19	9/11	6 months
15 cohort	Zhang Yan 2024	China	Intertrochanteric femoral fracture	operation time, intraoperative bleeding、Hospital stay、Postoperative complication、Postoperative complication rate,VAS、ADL、Harris, etc.	PFBN	PFNA		40(25/15)	43(27/16)		81.4± 9.1	80.2± 11.6					PFBN: 18.2±0.9 months PFNA: 18.1±0.7 months
								18	36	14
								25	55	40
								35	37
								20	60
								28	28
								46	46
								20	25
								32	32
								24	24
								20	20
								30	30
								16		19
								25		20
						62		22	40	20	93
						83		40	43
								401	476	113	990
								339	393

## Sheet: Partial weight bearing time
Partial weight bearing time
Study	Country	Treatment	Tsample	Tmean	Tsd	Csample	Cmean	Csd	Time
Fu HP 2023A	China	B vs A	18	5.7	1.2	36	21.5	3.6				5.7	1.2	18	21.5	3.6	36
Fu HP 2023I	China	B vs I	18	5.7	1.2	14	14.4	2.1				5.7	1.2	18	14.4	2.1	14
Jin LK 2024A	China	B vs A	25	7.98	1.34	55	10.27	0.66				7.98	1.34	25	10.27	0.66	55
Jin LK 2024I	China	B vs I	25	7.98	1.34	40	8.22	0.46				7.98	1.34	25	8.22	0.46	40
Liu PY 2023	China	B vs A	35	23.73	3.68	37	30.67	4.53				23.73	3.68	35	30.67	4.53	37
Long ZM 2022	China	B vs A	20	8.01	3.11	60	21.33	5.64				8.01	3.11	20	21.33	5.64	60
Li ZT 2022	China	B vs A	46	7.9	2.7	46	21.2	5.7				7.9	2.7	46	21.2	5.7	46
Zhang RB 2022	China	B vs A	32	28.84	7.61	32	33.67	5.84				28.84	7.61	32	33.67	5.84	32
Yang DS 2023	China	B vs A	24	7.88	1.7	24	17.63	3.67				7.88	1.7	24	17.63	3.67	24
Wang YC 2023	China	B vs A	20	15.8	1.4	20	55.3	3.3				15.8	1.4	20	55.3	3.3	20
Wan Y 2024	China	B vs I	16	19.1	2	19	23.8	3.2				19.1	2	16	23.8	3.2	19
Fu HP 2024	China	B vs A	22	6.05	1.13	40	21.18	3.54
Fu HP 2024	China	B vs I	22	6.05	1.13	20	14.5	1.57

## Sheet: Full weight bearing time
Full weight bearing time(Week)
Study	Country	Treatment	Tsample	Tmean	Tsd	Csample	Cmean	Csd	Time
Liu PY 2023	China	B vs A	35	10.74	2.19	37	12.21	2.26			10.74	2.19	35	12.21	2.26	37
Lin D 2022	China	B vs A	20	7. 9	1. 2	25	9. 1	0. 9			7.9	1.2	20	9.1	0.9	25
Wang YC 2023	China	B vs A	20	50.7	5.9	20	74.3	8.2	Day		7.24	0.842857	20	10.61	1.17	20
Wan Y 2024	China	B vs I	16	51.6	4.9	19	66.7	7.3	Day		7.37	0.7	16	9.53	1.04	19

## Sheet: Fracture healing time
Fracture healing time(Week)
Study	Country	Active	Tsample	Tmean	Tsd	Csample	Cmean	Csd	Time
Fu HP 2023A	China	B vs A	18	14.1392	1.6089	36	15.8554	3.0883			14.1392	1.6089	18	15.8554	3.0883	36
Fu HP 2023I	China	B vs I	18	14.1392	1.6089	14	15.818	2.0594			14.1392	1.6089	18	15.818	2.0594	14
Jin LK 2024A	China	B vs A	25	10.14	2.33	55	13.68	2.36			10.14	2.33	25	13.68	2.36	55
Jin LK 2024I	China	B vs I	25	10.14	2.33	40	11.87	2.48			10.14	2.33	25	11.87	2.48	40
Liu PY 2023	China	B vs A	35	17.13	2.34	37	19.56	3.78			17.13	2.34	35	19.56	3.78	37
Long ZM 2022	China	B vs A	20	12.45	1.22	60	12.51	1.37			12.45	1.22	20	12.51	1.37	60
Ling F 2023	China	B vs A	28	15.6	3.6	28	16.8	4.8			15.6	3.6	28	16.8	4.8	28
Li ZT 2022	China	B vs A	46	12.3	0.5	46	12.6	0.7			12.3	0.5	46	12.6	0.7	46
Lin D 2022	China	B vs A	20	8. 7	0. 9	25	8. 5	0. 9			8.7	0.9	20	8.5	0.9	25
Yang DS 2023	China	B vs A	24	12.38	2.55	24	12.29	2.03			12.38	2.55	24	12.29	2.03	24
Wu YX 2023	China	B vs A	30	8.69	1.35	30	10.44	2.11			8.69	1.35	30	10.44	2.11	30
Jia C 2023	China	B vs I	25	12.64	1.89	20	14.2	3.08			12.64	1.89	25	14.2	3.08	20
Fu HP 2024	China	B vs A	22	14.45	1.41	40	16.35	1.76
Fu HP 2024	China	B vs I	22	14.45	1.41	20	15.65	1.18

## Sheet: Operation duration
Operation duration（min）
Study	Country	Treatment	Tsample	Tmean	Tsd	Csample	Cmean	Csd	Time
Fu HP 2023A	China	B vs A	18	70	7.9	36	60.3	6.6			70	7.9	18	60.3	6.6	36
Fu HP 2023I	China	B vs I	18	70	7.9	14	61	5			70	7.9	18	61	5	14
Jin LK 2024A	China	B vs A	25	81.14	12.65	55	74.1	8.62			81.14	12.65	25	74.1	8.62	55
Jin LK 2024I	China	B vs I	25	81.14	12.65	40	81.62	8.56			81.14	12.65	25	81.62	8.56	40
Liu PY 2023	China	B vs A	35	43.31	7.68	37	45.66	8.73			43.31	7.68	35	45.66	8.73	37
Long ZM 2022	China	B vs A	20	48.12	9.64	60	40.22	10.43			48.12	9.64	20	40.22	10.43	60
Ling F 2023	China	B vs A	28	57.9	12	28	59.6	10.6			57.9	12	28	59.6	10.6	28
Li ZT 2022	China	B vs A	46	47.3	11.4	46	39.2	15.3			47.3	11.4	46	39.2	15.3	46
Lin D 2022	China	B vs A	20	74. 1	3. 8	25	73. 1	5. 7			74.1	3.8	20	73.1	5.7	25
Zhang RB 2022	China	B vs A	32	61.68	9.37	32	70.12	12.25			61.68	9.37	32	70.12	12.25	32
Yang DS 2023	China	B vs A	24	39.25	8.28	24	27	6.21			39.25	8.28	24	27	6.21	24
Wang YC 2023	China	B vs A	20	55.9	8.2	20	45.4	7.9			55.9	8.2	20	45.4	7.9	20
Wu YX 2023	China	B vs A	30	45.65	5.31	30	60.35	5.23			45.65	5.31	30	60.35	5.23	30
Wan Y 2024	China	B vs I	16	111.6	15.9	19	98.9	15.9			111.6	15.9	16	98.9	15.9	19
Jia C 2023	China	B vs I	25	61.2	14.66	20	66.6	10.46			61.2	14.66	25	66.6	10.46	20
Zhang Y 2024	China	B vs A	40	63.3	14.5	43	62.9	15.8
Fu HP 2024	China	B vs A	22	70.45	6.879	40	60	6.58
Fu HP 2024	China	B vs I	22	70.45	6.879	20	58.7	5.89

## Sheet: Fracture reduction quality
Liu PY 2023	China
	Excellent	Good	Bad	Total	Excellent and good rate
PFBN	20	13	2	35	0.942857
PFNA	15	14	8	37	0.783784
Long ZM 2022	China
	Excellent and good	Total	Excellent and good rate
PFBN	19	20	0.95
PFNA	59	60	0.983333
Ling F 2023	China
	Excellent	Good	total	Excellent and good rate
PFBN	18	10	28	1
PFNA	19	9	28	1
Li ZT 2022	China
	Excellent and good	Total	Excellent and good rate
PFBN	41	46	0.891304
PFNA	40	46	0.869565
Wang YC 2023	China
	Excellent and good	Total	Excellent and good rate
PFBN	19	20	0.95
PFNA	18	20	0.9
Wu YX 2023	China
	Excellent and good	Total	Excellent and good rate
PFBN	29	30	0.966667
PFNA	22	30	0.733333
Wan Y 2024	China
	Excellent and good	Total	Excellent and good rate
PFBN	16	16	1
Intertan	18	19	0.947368
Jia C 2023	China
	Excellent and good	Total	Excellent and good rate
PFBN	22	25	0.88
Intertan	18	20	0.9

## Sheet: Hospital stay
Hospital stay（Day）
Study	Country	Active	Tsample	Tmean	Tsd	Csample	Cmean	Csd	Time
Jin LK 2024A	China	B vs A	25	17.21	2.27	55	17.37	2.38			17.21	2.27	25	17.37	2.38	55
Jin LK 2024I	China	B vs I	25	17.21	2.27	40	17.84	2.58			17.21	2.27	25	17.84	2.58	40
Liu PY 2023	China	B vs A	35	12.99	3.21	37	13.41	2.93			12.99	3.21	35	13.41	2.93	37
Long ZM 2022	China	B vs A	20	4.37	1.33	60	4.61	1.53			4.37	1.33	20	4.61	1.53	60
Li ZT 2022	China	B vs A	46	4.2	1.6	46	4.6	2.1			4.2	1.6	46	4.6	2.1	46
Zhang RB 2022	China	B vs A	32	10.67	2.42	32	13.26	2.86			10.67	2.42	32	13.26	2.86	32
Yang DS 2023	China	B vs A	24	9.88	0.48	24	9.71	0.32			9.88	0.48	24	9.71	0.32	24
Wang YC 2023	China	B vs A	20	10.2	2.3	20	9.7	2.3			10.2	2.3	20	9.7	2.3	20
Wan Y 2024	China	B vs I	16	9.9	1.4	19	10.2	1.7			9.9	1.4	16	10.2	1.7	19
Jia C 2023	China	B vs I	25	11.24	3.22	20	11.4	3.34			11.24	3.22	25	11.4	3.34	20
Zhang Y 2024	China	B vs A	40	9.5	2.8	43	10.2	2.6
Fu HP 2024	China	B vs A	22	8.14	1.21	40	13.2	3.24
Fu HP 2024	China	B vs I	22	8.14	1.21	20	14.8	3.17

## Sheet: Intraoperative blood loss
Intraoperative blood loss
Study	Country	Active	Tsample	Tmean	Tsd	Csample	Cmean	Csd	Time
Jin LK 2024A	China	B vs A	25	179.81	40.09	55	172.84	21.08				179.81	40.09	25	172.84	21.08	55
Jin LK 2024I	China	B vs I	25	179.81	40.09	40	181.65	23.58				179.81	40.09	25	181.65	23.58	40
Liu PY 2023	China	B vs A	35	93.73	16.26	37	98.66	20.63				93.73	16.26	35	98.66	20.63	37
Long ZM 2022	China	B vs A	20	124.88	20.64	60	129.79	20.46				124.88	20.64	20	129.79	20.46	60
Ling F 2023	China	B vs A	28	96.9	12	28	99.8	12.3				96.9	12	28	99.8	12.3	28
Li ZT 2022	China	B vs A	46	130.6	21.3	46	123.5	17.8				130.6	21.3	46	123.5	17.8	46
Lin D 2022	China	B vs A	20	103. 6	11. 9	25	102. 4	13. 6				103.6	11.9	20	102.4	13.6	25
Zhang RB 2022	China	B vs A	32	111.1	18.64	32	162.81	13.54				111.1	18.64	32	162.81	13.54	32
Yang DS 2023	China	B vs A	24	110	17.69	24	105	14.74				110	17.69	24	105	14.74	24
Wang YC 2023	China	B vs A	20	35.2	9.9	20	34.8	7.9				35.2	9.9	20	34.8	7.9	20
Wu YX 2023	China	B vs A	30	46.56	10.25	30	232.65	41.35				46.56	10.25	30	232.65	41.35	30
Wan Y 2024	China	B vs I	16	145.6	39.5	19	120.5	31.1				145.6	39.5	16	120.5	31.1	19
Jia C 2023	China	B vs I	25	150.75	37.67	20	165.75	24.33				150.75	37.67	25	165.75	24.33	20
Zhang Y 2024	China	B vs A	40	119.8	60.9	43	102.6	59.1
Fu HP 2024	China	B vs A	22	161.82	35	40	131.5	23.49
Fu HP 2024	China	B vs I	22	161.82	35	20	128.5	21.83

## Sheet: Harris  grade
Fu HP 2023A	China
	Excellent	Good	General	Excellent and good rate	Total
PFBN	4	11	3	0.833333	18
PFNA	9	21	6	0.833333	36
Intertan	2	9	3	0.785714	14
Long ZM 2022	China
	Excellent and good	Excellent and good rate	Total
PFBN	18	0.9	20
PFNA	58	0.966667	60
Li ZT 2022	China
	Excellent and good	Excellent and good rate	Total
PFBN	41	0.891304	46
PFNA	40	0.869565	46
Zhang RB 2022	China
	Excellent	Good	General	Bad	Excellent and good rate	Total
PFBN	20	9	3	0	0.90625	32
PFNA	8	14	7	3	0.6875	32
Fu HP 2024	China
	Excellent and good	Excellent and good rate	Total
PFBN	19	0.863636	22
PFNA	34	0.85	40
Intertan	17	0.85	20

## Sheet: Harri score
Harris total
Study	Country	Treatment	Tsample	Tmean	Tsd	Csample	Cmean	Csd	Time
Jin LK 2024A	China	B vs A	25	30.56	4.34	55	30.67	3.34	B			30.56	4.34	25	30.67	3.34	55		B
Jin LK 2024A	China	B vs A	25	70.52	5.34	55	51.46	5.36	1m			70.52	5.34	25	51.46	5.36	55		1m
Jin LK 2024A	China	B vs A	25	84.54	3.22	55	84.33	3.3	6m			84.54	3.22	25	84.33	3.3	55		6m
Jin LK 2024A	China	B vs A	25	84.46	4.44	55	84.52	4.45	12m			84.46	4.44	25	84.52	4.45	55		12m
Jin LK 2024I	China	B vs I	25	30.56	4.34	40	30.13	3.63	B			30.56	4.34	25	30.13	3.63	40		B
Jin LK 2024I	China	B vs I	25	70.52	5.34	40	69.81	6.17	1m			70.52	5.34	25	69.81	6.17	40		1m
Jin LK 2024I	China	B vs I	25	84.54	3.22	40	84.69	3.24	6m			84.54	3.22	25	84.69	3.24	40		6m
Jin LK 2024I	China	B vs I	25	84.46	4.44	40	84.65	4.53	12m			84.46	4.44	25	84.65	4.53	40		12m
Liu PY 2023	China	B vs A	35	55.61	8.81	37	50.72	7.93	1m			55.61	8.81	35	50.72	7.93	37		1m
Liu PY 2023	China	B vs A	35	86.53	9.93	37	79.75	8.52	3m			86.53	9.93	35	79.75	8.52	37		3m
Liu PY 2023	China	B vs A	35	95.63	10.79	37	89.18	10.22	6m			95.63	10.79	35	89.18	10.22	37		6m
Ling F 2023	China	B vs A	28	83.9	4.3	28	81	3.4	Last follow-up			83.9	4.3	28	81	3.4	28		末次随访
Lin D 2022	China	B vs A	20	79. 5	2. 2	25	79. 1	3. 5	3m			79. 5	2. 2	20	79. 1	3. 5	25		3m
Lin D 2022	China	B vs A	20	79. 8	2. 8	25	80. 0	3. 5	6m			79. 8	2. 8	20	80. 0	3. 5	25		6m
Lin D 2022	China	B vs A	20	80. 2	3. 1	25	81. 1	4. 3	Last follow-up			80. 2	3. 1	20	81. 1	4. 3	25		末次随访
Wang YC 2023	China	B vs A	20	68.7	4.7	20	43.3	5.3	1m			68.7	4.7	20	43.3	5.3	20		1m
Wang YC 2023	China	B vs A	20	72.3	5.2	20	69.2	5	3m			72.3	5.2	20	69.2	5	20		3m
Wang YC 2023	China	B vs A	20	80.4	4.4	20	79.4	4.3	6m			80.4	4.4	20	79.4	4.3	20		6m
Wu YX 2023	China	B vs A	30	60.4	5.32	30	60.39	5.24	pre-operation			60.4	5.32	30	60.39	5.24	30		术前
Wu YX 2023	China	B vs A	30	94.35	4.16	30	89.35	4.15	Last follow-up			94.35	4.16	30	89.35	4.15	30		末次随访
Wan Y 2024	China	B vs I	16	64.9	5.4	19	55	5.72	1m			64.9	5.4	16	55	5.72	19		1m
Wan Y 2024	China	B vs I	16	73.1	4.8	19	67.7	5.3	3m			73.1	4.8	16	67.7	5.3	19		3m
Wan Y 2024	China	B vs I	16	85.7	4	19	82.7	4.7	Last follow-up			85.7	4	16	82.7	4.7	19		末次随访
Jia C 2023	China	B vs I	25	79.76	4.58	20	80.92	4.64	6m			79.76	4.58	25	80.92	4.64	20		6m
Zhang Y 2024	China	B vs A	40	78.1	6.9	43	75	10.2	Last follow-up
Harris function
Study	Country	Treatment	Tsample	Tmean	Tsd	Csample	Cmean	Csd	Time
Jin LK 2024A	China	B vs A	25	4.2	0.56	55	4.12	0.58	B
Jin LK 2024A	China	B vs A	25	23.22	3.15	55	13.35	2.25	1m
Jin LK 2024A	China	B vs A	25	37.1	6.93	55	36.78	6.13	6m
Jin LK 2024A	China	B vs A	25	37.95	4.78	55	35.95	6.78	12m		Harris rang of motion
Jin LK 2024I	China	B vs I	25	4.2	0.56	40	4.21	0.61	B			Study	Country	Treatment	Tsample	Tmean	Tsd	Csample	Cmean	Csd	Time
Jin LK 2024I	China	B vs I	25	23.22	3.15	40	20.18	2.59	1m			Jin LK 2024A	China	B vs A	25	2.82	0.61	55	2.73	0.52	B
Jin LK 2024I	China	B vs I	25	37.1	6.93	40	36.1	5.97	6m			Jin LK 2024A	China	B vs A	25	3.35	0.39	55	3.56	0.87	1m
Jin LK 2024I	China	B vs I	25	37.95	4.78	40	37.02	5.18	12m			Jin LK 2024A	China	B vs A	25	4.58	0.8	55	4.5	0.75	6m
												Jin LK 2024A	China	B vs A	25	4.68	0.88	55	4.61	0.85	12m
												Jin LK 2024I	China	B vs I	25	2.82	0.61	40	2.8	0.48	B
												Jin LK 2024I	China	B vs I	25	3.35	0.39	40	3.42	0.74	1m
												Jin LK 2024I	China	B vs I	25	4.58	0.8	40	4.61	0.91	6m
												Jin LK 2024I	China	B vs I	25	4.68	0.88	40	4.63	0.9	12m
Harris Deformity
Study	Country	Treatment	Tsample	Tmean	Tsd	Csample	Cmean	Csd	Time
Jin LK 2024A	Jin LK 2024A	B vs A	25	3	0.12	55	2.9	0.23	B
Jin LK 2024A	Jin LK 2024A	B vs A	25	3.81	0.85	55	3.8	0.69	1m
Jin LK 2024A	Jin LK 2024A	B vs A	25	3.81	0.81	55	3.8	0.59	6m
Jin LK 2024A	Jin LK 2024A	B vs A	25	3.8	0.59	55	3.79	0.12	12m
Jin LK 2024I	Jin LK 2024I	B vs I	25	3	0.12	40	3	0.27	B
Jin LK 2024I	Jin LK 2024I	B vs I	25	3.81	0.85	40	3.08	0.83	1m
Jin LK 2024I	Jin LK 2024I	B vs I	25	3.81	0.81	40	3.88	0.75	6m
Jin LK 2024I	Jin LK 2024I	B vs I	25	3.8	0.59	40	3.81	0.65	12m
Harris pain
Study	Country	Treatment	Tsample	Tmean	Tsd	Csample	Cmean	Csd	Time
Jin LK 2024A	Jin LK 2024A	B vs A	25	20.23	0.89	55	20.98	0.98	B
Jin LK 2024A	Jin LK 2024A	B vs A	25	38.23	5.12	55	38.35	6.12	1m
Jin LK 2024A	Jin LK 2024A	B vs A	25	40.32	5.98	55	40.22	6.13	6m
Jin LK 2024A	Jin LK 2024A	B vs A	25	40.12	5.12	55	39.81	6.33	12m
Jin LK 2024I	Jin LK 2024I	B vs I	25	20.23	0.89	40	20.88	1.02	B
Jin LK 2024I	Jin LK 2024I	B vs I	25	38.23	5.12	40	38.41	6.02	1m
Jin LK 2024I	Jin LK 2024I	B vs I	25	40.32	5.98	40	40.36	6.39	6m
Jin LK 2024I	Jin LK 2024I	B vs I	25	40.12	5.12	40	40.11	6.02	12m

[truncated: 8 more sheets: VAS, ROM, Femoral neck-shaft angle , Incision length, Postoperative complication , Tip-apex distance, Intraoperative fluoroscopy time, Blood transfusion]
